# Supplementary material
Source: publisher site journal article supplement (https://www.spandidos-publications.com/3096/downloadSupplementary)

Figure S1. Cell viability following transfection. No significant differences were observed in cell viability following transfection of MCF7 and HCC1937 cells with LV5-NC or LV5-ING3 lentivirus vectors. ING3, inhibitor of growth 3; NC, negative control.

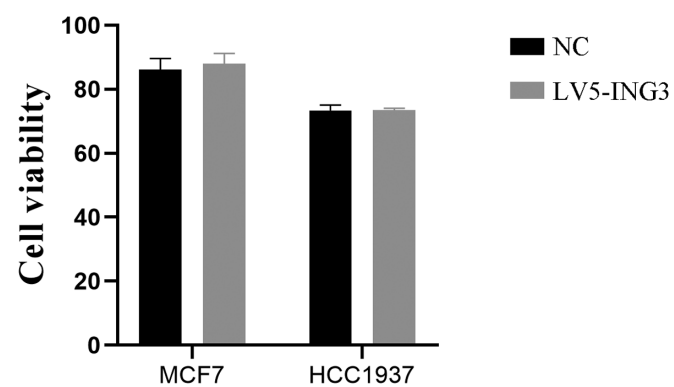

Supplement: Supplementary file 1 [file downloadSupplementary]
